# Supplementary material for: Biliary microbial patterns in primary sclerosing cholangitis are linked to poorer transplant-free survival
Source: PubMed Central journal article supplement — Hepatol Commun. 2023 May 18;7(6):e0156. doi: 10.1097/HC9.0000000000000156 (PMC10540062; doi:10.1097/hc9.0000000000000156), 2023-05-18
Supplement: hc9-7-e0156-s001.pdf [file hc9-7-e0156-s001.pdf]

## Supplementary Material

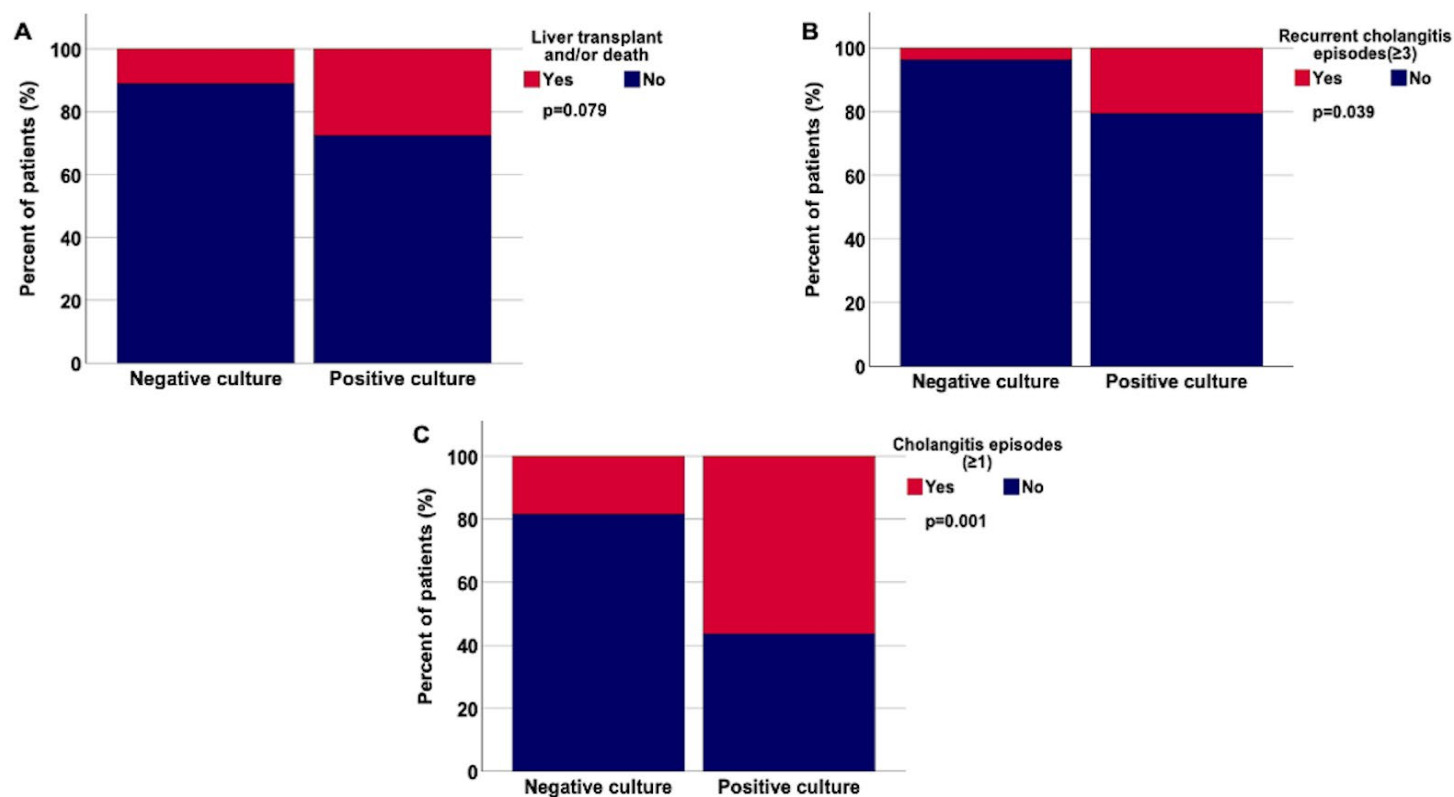

**Supplementary Figure 1 Positive bile cultures are associated with recurrent cholangitis episodes.**

28% (n=24) of patients with positive bile cultures received liver transplantation or died from a liver-related cause, while the proportion in patients with negative culture was 11% (n=3) (OR, 3.048; 95% CI, 0.840-11.061; p=0.079) (**A**). Patients with positive bile culture results suffered significantly more often from recurrent (≥ 3) cholangitis episodes compared to patients with negative bile culture results (n=18 (21%); OR, 6.783; 95% CI, 0.861-53.406; p=0.039) (**B**). 56% of patients with positive bile culture results (n=49) suffered from at least one cholangitis episode (OR 5.674; 95% CI, 1.967-16.367; p=0.001) (**C**). A p-value <0.05 was considered significant.

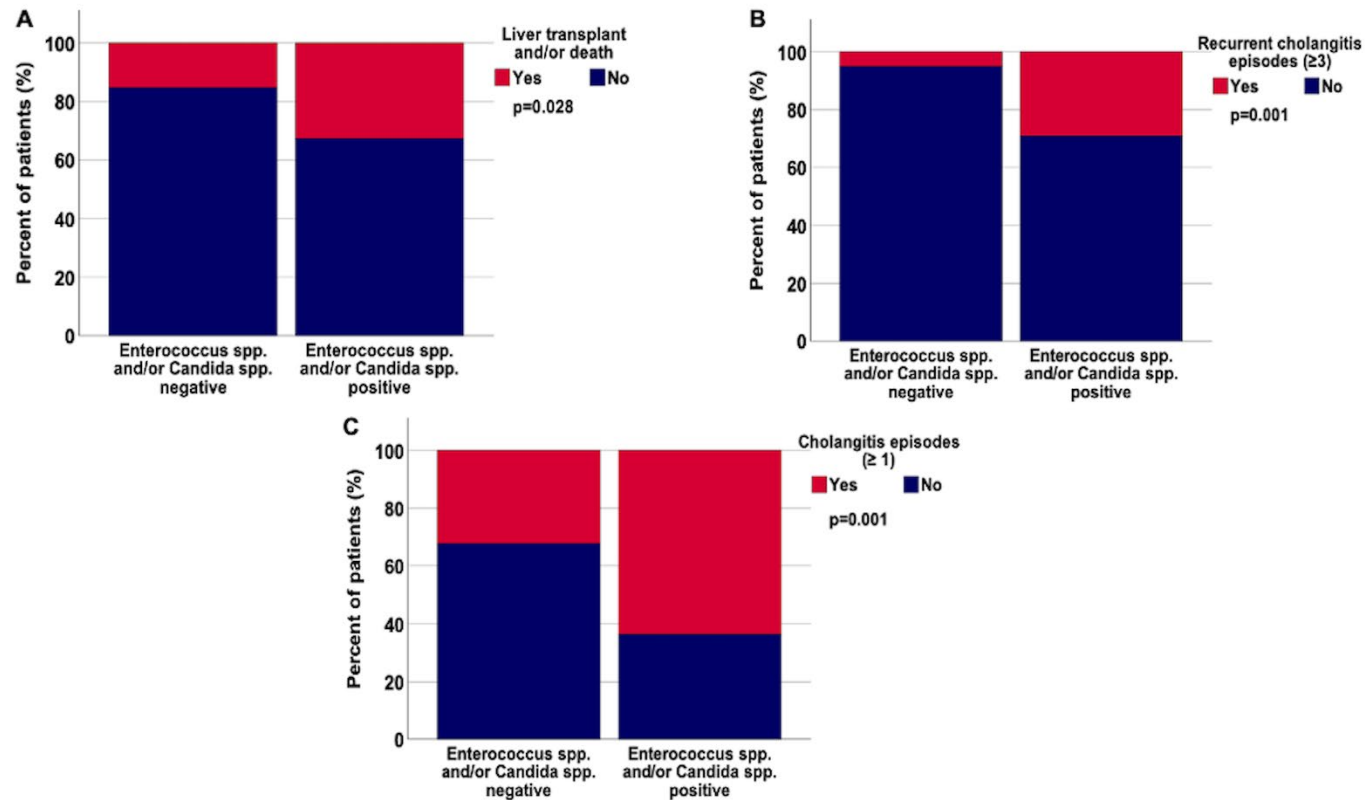

**Supplementary Figure 2 Candida spp. and/or Enterococcus spp. in bile is associated with a poorer outcome**

Patients positive for *Enterococcus* spp. and/or *Candida* spp. had a more frequent occurrence of liver transplantation and/or liver-related death (OR, 2.703; 95% CI, 1.092-6.688; p=0.028) (**A**). Presence of either *Enterococcus* spp. and/or *Candida* spp. in bile was linked to a higher frequency of developing recurrent cholangitis episodes (≥ 3) (OR, 7.658; 95% CI, 2.089-28.075; p=0.001) (**B**). Moreover, 64% of patients with *Enterococcus* spp. and/or *Candida* developed at least one episode of cholangitis (OR, 3.684; 95% CI, 1.698-7.994; p=0.001) (**C**). A p-value <0.05 was considered significant.

**Supplementary Table 1 Baseline characteristics of Control cohort**

|                                                    | <b>Control cohort<br/>(n=50)</b> |
|----------------------------------------------------|----------------------------------|
| <b>Gender</b>                                      |                                  |
| ▪ Female                                           | ▪ 5 (10%)                        |
| ▪ Male                                             | ▪ 45 (90%)                       |
| <b>Median age at time of bile sampling (range)</b> | <b>61 (12-71)</b>                |
| <b>Reason for liver transplantation</b>            |                                  |
| ▪ Hepatocellular carcinoma                         | ▪ 36 (72%)                       |
| ▪ Alcohol-related liver disease                    | ▪ 11 (22%)                       |
| ▪ Nonalcoholic steatohepatitis (NASH)              | ▪ 3 (6%)                         |
| <b>Positive bile cultures</b>                      | <b>6 (12%)</b>                   |
| ▪ Enterococcus spp.                                | ▪ 2 (4%)                         |
| ▪ Streptococcus                                    | ▪ 1 (2%)                         |
| ▪ Candida                                          | ▪ 1 (2%)                         |
| ▪ Other                                            | ▪ 2 (4%)                         |

**Supplementary Table 2 Subgroup analysis – Outcome**

|                                            | <i>Positive culture<br/>n=87</i> |                             |              | <i>Enterobacteriaceae<br/>n=28 (25%)</i> |                     |         | <i>Enterococcus spp.<br/>n=42 (32%)</i> |                            |              | <i>Candida spp.<br/>n=19 (22%)</i> |                               |                  | <i>Candida and/or Enterococcus<br/>spp.<br/>n=55 (48%)</i> |                             |              |
|--------------------------------------------|----------------------------------|-----------------------------|--------------|------------------------------------------|---------------------|---------|-----------------------------------------|----------------------------|--------------|------------------------------------|-------------------------------|------------------|------------------------------------------------------------|-----------------------------|--------------|
|                                            | No. of patients (%)              | OR (95%CI)                  | p-value      | No. of patients (%)                      | OR (95%CI)          | p-value | No. of patients (%)                     | OR (95%CI)                 | p-value      | No. of patients (%)                | OR (95%CI)                    | p-value          | No. of patients (%)                                        | OR (95%CI)                  | p-value      |
| <b>Liver transplant and/or death</b>       | 24 (28%)                         | 3.048 (0.840-11.061)        | 0.079        | 7 (25%)                                  | 1.100 (0.408-2.963) | 0.850   | <b>15 (36%)</b>                         | <b>2.778 (1.147-6.728)</b> | <b>0.021</b> | 8 (36%)                            | 2.195 (0.804-5.996)           | 0.119            | <b>18 (33%)</b>                                            | <b>2.703 (1.092-6.688)</b>  | <b>0.028</b> |
| ▪ Liver transplant                         | 19 (22%)                         | 2.235 (0.607-8.231)         | 0.217        | 6 (21%)                                  | 1.193 (0.416-3.422) | 0.742   | 12 (29%)                                | 2.480 (0.963-6.385)        | 0.055        | 7 (32%)                            | 2.396 (0.835-6.973)           | 0.098            | 14 (26%)                                                   | 2.177 (0.833-5.691)         | 0.108        |
| ▪ Liver-related death                      | 5 (6%)                           | -                           | 0.203        | 1 (4%)                                   | 0.759 (0.081-7.090) | 0.809   | 3 (7%)                                  | 2.692 (0.431-16.810)       | 0.272        | 1 (5%)                             | 1.048 (0.111-9.864)           | 0.968            | 4 (7%)                                                     | 4.549 (0.492-42.026)        | 0.146        |
| <b>Recurrent cholangitis episodes (≥3)</b> | <b>18 (21%)</b>                  | <b>6.783 (0.861-53.406)</b> | <b>0.039</b> | 8 (29%)                                  | 2.727 (0.968-7.683) | 0.052   | <b>11 (26%)</b>                         | <b>2.839 (1.037-7.768)</b> | <b>0.037</b> | <b>9 (41%)</b>                     | <b>5.677 (1.940-16.616)</b>   | <b>0.001</b>     | <b>16 (29%)</b>                                            | <b>7.658 (2.089-28.075)</b> | <b>0.001</b> |
| ▪ Cholangitis episodes (≥ 1)               | <b>49 (56%)</b>                  | <b>5.674 (1.967-16.367)</b> | <b>0.001</b> | 17 (61%)                                 | 2.047 (0.857-4.887) | 0.103   | 23 (55%)                                | 1.601 (0.744-3.444)        | 0.227        | <b>21 (96%)</b>                    | <b>37.545 (4.829-291.891)</b> | <b>&lt;0.001</b> | <b>35 (64%)</b>                                            | <b>3.684 (1.698-7.994)</b>  | <b>0.001</b> |

Significant results (p<0.05) are shown in bold type. Initial diagnosis (ID); Autoimmune hepatitis (AIH); Endoscopic retrograde cholangiopancreatography (ERCP); Endoscopic retrograde cholangiopancreatography (ERCP); Odds ratio (OR); Confidence interval (CI)

### Supplementary Table 3 Multivariable logistic regression analysis for features associated with positive cultures

| Parameter                  | Multivariable logistic regression |                             |
|----------------------------|-----------------------------------|-----------------------------|
|                            | p-value                           | Odds ratio (95% CI)         |
| Gender                     | 0.538                             | 1.394 (0.484-4.018)         |
| Age at initial diagnosis   | 0.323                             | 1.018 (0.983-1.054)         |
| Inflammatory bowel disease | <b>0.003</b>                      | <b>4.707 (1.688-13.128)</b> |
| ≥ 2 ERCPs per patient      | 0.812                             | 0.762 (0.081-7.194)         |

Significant results (p<0.05) are shown in bold type. Endoscopic retrograde cholangiopancreatography (ERCP); Confidence interval (CI)

### Supplementary Table 4: Clinical characteristics and Odds ratio for patients with specific pathogens in bile samples

|                                   | <i>Enterobacteriaceae</i><br>n=28 (25%) |                     |         | <i>Enterococcus spp.</i><br>n=42 (32%) |                            |              | <i>Other Streptococcus and/or Staphylococcus spp.</i><br>n=31 (27%) |                     |         |
|-----------------------------------|-----------------------------------------|---------------------|---------|----------------------------------------|----------------------------|--------------|---------------------------------------------------------------------|---------------------|---------|
|                                   | No. of patients (%)                     | OR (95%CI)          | p-value | No. of patients (%)                    | OR (95%CI)                 | p-value      | No. of patients (%)                                                 | OR (95%CI)          | p-value |
| <b>Gender</b>                     |                                         |                     |         |                                        |                            |              |                                                                     |                     |         |
| ▪ Female                          | 6 (21%)                                 | 0.565 (0.206-1.550) | 0.264   | 13 (31%)                               | 1.089 (0.475-2.493)        | 0.841        | 12 (39%)                                                            | 1.751 (0.732-4.187) | 0.205   |
| ▪ Male                            | 22 (79%)                                |                     |         | 29 (69%)                               |                            |              | 19 (61%)                                                            |                     |         |
| <b>Age at ID (≥ 30 years)</b>     | 15 (54%)                                | 1.1 (0.467-2.592)   | 0.827   | <b>28 (67%)</b>                        | <b>2.667 (1.201-5.919)</b> | <b>0.015</b> | 15 (48%)                                                            | 0.828 (0.362-1.897) | 0.656   |
| <b>Overlap with AIH</b>           | 3 (11%)                                 | 0.818 (0.211-3.170) | 0.771   | 3 (7%)                                 | 0.427 (0.112-1.626)        | 0.202        | 4 (13%)                                                             | 1.081 (0.313-3.740) | 0.902   |
| <b>Inflammatory bowel disease</b> | 23 (82%)                                | 1.993 (0.683-5.817) | 0.201   | 34 (81%)                               | 1.995 (0.798-4.985)        | 0.135        | 23 (74%)                                                            | 1.102 (0.432-2.813) | 0.839   |
| <b>Proton-pump inhibitor use</b>  | 7 (25%)                                 | 0.970 (0.363-2.592) | 0.951   | 10 (24%)                               | 0.872 (0.361-2.107)        | 0.760        | 7 (23%)                                                             | 0.809 (0.306-2.139) | 0.669   |
| <b>Relevant stenosis</b>          | 24 (86%)                                | 0.370 (0.092-1.489) | 0.149   | 37 (88%)                               | 0.435 (0.110-1.721)        | 0.225        | 28 (90%)                                                            | 0.727 (0.170-3.106) | 0.666   |

|                            |          |                     |       |          |                     |       |          |                     |       |
|----------------------------|----------|---------------------|-------|----------|---------------------|-------|----------|---------------------|-------|
| $\geq 2$ ERCPS per patient | 26 (93%) | 0.975 (0.185-5.130) | 0.976 | 39 (93%) | 0.970 (0.220-4.282) | 0.968 | 29 (94%) | 1.130 (0.216-5.920) | 0.885 |
|----------------------------|----------|---------------------|-------|----------|---------------------|-------|----------|---------------------|-------|

Significant results (p<0.05) are shown in bold type. Initial diagnosis (ID); Autoimmune hepatitis (AIH); Endoscopic retrograde cholangiopancreatography (ERCP); Odds ratio (OR); Confidence interval (CI)

### Supplementary Table 5 Multivariable logistic regression analysis for features associated with biliary candidiasis

| Multivariable logistic regression |              |                            |
|-----------------------------------|--------------|----------------------------|
| Parameter                         | p-value      | OR (95% CI)                |
| Age at initial diagnosis          | 0.570        | 1.011 (0.974-1.050)        |
| Inflammatory bowel disease        | 0.452        | 1.595 (0.473-5.381)        |
| Proton-pump inhibitor intake      | <b>0.015</b> | <b>3.559 (1.275-9.937)</b> |

Significant results (p<0.05) are shown in bold type. Odds ratio (OR); Autoimmune hepatitis (AIH); Model for End-Stage Liver Disease (MELD)
